# Supplementary material for: Diabetes Differentially Affects Depression and Self-Rated Health by Age in the U.S.
Source: Oxford University Press journal article supplement (doi:10.2337/dc11-2266), 2012-05-20
Supplement: dc112266supplementarydata.pdf [file dc112266supplementarydata.pdf]

SUPPLEMENTARY DATA

**Supplementary Table 1.** Demographic and clinical characteristics of older Americans with and without diabetes

| Age group, years                                 | 57-64     | 57-64      |                       | 65-74     | 65-74      |                       | 75-85     | 75-85     |                       |                       |                       |
|--------------------------------------------------|-----------|------------|-----------------------|-----------|------------|-----------------------|-----------|-----------|-----------------------|-----------------------|-----------------------|
|                                                  | Diabetes  | No DM      | <i>P</i> <sup>1</sup> | Diabetes  | No DM      | <i>P</i> <sup>2</sup> | Diabetes  | No DM     | <i>P</i> <sup>3</sup> | <i>P</i> <sup>4</sup> | <i>P</i> <sup>5</sup> |
| Number                                           | 202       | 818        |                       | 267       | 825        |                       | 173       | 720       |                       |                       |                       |
| DM prevalence by age group, %                    | 20        | -          |                       | 24        | -          |                       | 19        | -         |                       | <0.0001               |                       |
| <b>Demographic characteristics</b>               |           |            |                       |           |            |                       |           |           |                       |                       |                       |
| Female sex, percent                              | 45        | 49         |                       | 49        | 50         |                       | 51        | 59        |                       | 0.8                   | 0.012                 |
| Ethnic group, %                                  |           |            |                       |           |            |                       |           |           |                       | 0.4                   | 0.0002                |
| White                                            | 68.3      | 80.5       |                       | 70.2      | 82.4       |                       | 77.5      | 88.2      |                       |                       |                       |
| Black                                            | 20.8      | 7.9        |                       | 16.9      | 9.7        |                       | 12.6      | 6.5       |                       |                       |                       |
| Hispanic                                         | 8.0       | 8.3        |                       | 9.2       | 6.2        |                       | 8.5       | 3.6       |                       |                       |                       |
| Other                                            | 2.9       | 3.3        |                       | 3.7       | 1.7        |                       | 1.4       | 1.7       |                       |                       |                       |
| Educational attainment, %                        |           |            |                       |           |            |                       |           |           |                       | 0.004                 | <0.0001               |
| Less than high school                            | 14.4      | 12.9       |                       | 28.5      | 16.6       |                       | 27.6      | 26.8      |                       |                       |                       |
| High school equivalent                           | 28.9      | 23.5       |                       | 25.7      | 27.4       |                       | 32.9      | 30.8      |                       |                       |                       |
| Some college                                     | 33.0      | 31.3       |                       | 28.5      | 33.4       |                       | 29.3      | 22.8      |                       |                       |                       |
| Bachelor's or higher                             | 23.7      | 32.3       |                       | 17.4      | 22.8       |                       | 10.2      | 19.8      |                       |                       |                       |
| <b>Clinical characteristics</b>                  |           |            |                       |           |            |                       |           |           |                       |                       |                       |
| Heart attack or heart failure, %                 | 9.2       | 3.9        |                       | 8.8       | 4.1        |                       | 6.6       | 4.7       |                       | 0.4                   | <0.0001               |
| Hypertension, %                                  | 29        | 17         |                       | 31        | 17         |                       | 16        | 14        |                       | 0.2                   | <0.0001               |
| Poor kidney function, %                          | 3.5       | 0.6        |                       | 3.0       | 0.8        |                       | 2.2       | 1.2       |                       | 0.8                   | <0.0001               |
| Fair or poor self-rated eyesight, %              | 8.1       | 5.0        |                       | 9.0       | 4.4        |                       | 5.9       | 3.9       |                       | 0.3                   | 0.1                   |
| Arthritis, %                                     | 23        | 18         |                       | 20        | 17         |                       | 16        | 15        |                       | 0.02                  | <0.0001               |
| Cancer, %                                        | 4.1       | 3.3        |                       | 4.7       | 4.7        |                       | 3.4       | 3.4       |                       | 0.4                   | <0.0001               |
| Number of drugs, mean (SE)                       | 6.9 (0.4) | 3.9 (0.1)  |                       | 7.8 (0.3) | 5.1 (0.1)  |                       | 7.6 (0.3) | 5.4 (0.2) |                       | 0.2                   | <0.0001               |
| Insulin use, %                                   | 6.3       | -          |                       | 7.3       | -          |                       | 3.1       | -         |                       | 0.5                   |                       |
| HbA1c (%), mean (SE)                             | 7.4 (0.2) | 5.8 (0.04) |                       | 6.9 (0.1) | 5.7 (0.02) |                       | 6.9 (0.1) | 5.8 (.02) |                       | 0.03                  | 0.0005                |
| SBP <sup>6</sup> , mmHg, mean (SE)               | 137 (2)   | 133 (0.5)  |                       | 140 (2)   | 136 (0.8)  |                       | 140 (2)   | 139 (0.8) |                       | 0.2                   | 0.0001                |
| DBP <sup>7</sup> , mmHg, mean (SE)               | 82 (1)    | 84 (0.4)   |                       | 79 (1)    | 81 (0.6)   |                       | 74 (1)    | 75 (0.5)  |                       | <0.0001               | <0.0001               |
| BMI <sup>8</sup> (kg/m <sup>2</sup> ), mean (SE) | 33 (0.5)  | 29 (0.2)   |                       | 31 (0.4)  | 28 (.2)    |                       | 30 (0.6)  | 27 (0.2)  |                       | <0.0001               | <0.0001               |
| <b>Global health measures<sup>9</sup></b>        |           |            |                       |           |            |                       |           |           |                       |                       |                       |
| Comorbidity score, mean (SE) <sup>10</sup>       | 17 (1.2)  | 11 (0.3)   | <.0001                | 18 (0.8)  | 15 (0.4)   | 0.0004                | 20 (0.7)  | 17 (0.5)  | 0.0091                | 0.2                   | <0.0001               |
| Fair or poor physical health, %                  | 17.6      | 7.3        | <.0001                | 14.4      | 6.1        | <.0001                | 9.8       | 7.2       | 0.0008                |                       |                       |
| Worse or much worse health relative to peers, %  | 12.7      | 4.0        | <.0001                | 4.8       | 2.2        | 0.0059                | 2.4       | 1.8       | 0.1634                |                       |                       |

## SUPPLEMENTARY DATA

|                               |           |           |        |           |           |        |           |           |        |      |         |
|-------------------------------|-----------|-----------|--------|-----------|-----------|--------|-----------|-----------|--------|------|---------|
| CES-D score, mean (SE)        | 7.0 (0.6) | 4.7 (0.2) | 0.0012 | 6.1 (0.3) | 4.9 (0.2) | 0.0032 | 5.6 (0.4) | 6.0 (0.2) | 0.3147 | 0.07 | <0.0001 |
| Depression, %                 | 13.6      | 7.6       | 0.0008 | 9.6       | 6.4       | 0.0310 | 4.6       | 6.8       | 0.0703 |      |         |
| Fair or poor mental health, % | 6.4       | 3.5       | 0.0077 | 5.3       | 2.6       | 0.0024 | 3.1       | 2.9       | 0.4348 |      |         |

Values except for number adjusted for probability of selection and non-response, survey stratum, and cluster. DM=Diabetes mellitus

1. P value for difference across diabetics and non-diabetics in the 57-64 age groups. 2. P value for difference across diabetics and non-diabetics in the 65-74 age groups. 3. P value for difference across diabetics and non-diabetics in the 75-85 age groups. 4. P value for difference across age groups among respondents with diabetes. 5. P value for difference across age groups among respondents without diabetes. 6. Systolic blood pressure. 7. Diastolic blood pressure. 8. Body mass index. 9. All measures are by self-report. 10 Comorbidity score is sum of sex-standardized non-diabetes comorbid conditions recorded in NSHAP.

**Supplementary Table 2.** Logistic regression models predicting depression, fair or poor self rated physical health, health relative to peers, and mental health<sup>1</sup>

|                                     | <b>Depression<sup>2</sup></b> |          | <b>Poor /fair self-rated physical health</b> |          | <b>Worse or much worse health relative to peers</b> |          | <b>Poor / fair self-rated mental health</b> |          |
|-------------------------------------|-------------------------------|----------|----------------------------------------------|----------|-----------------------------------------------------|----------|---------------------------------------------|----------|
|                                     | <b>OR (95% CI)</b>            | <b>P</b> | <b>OR (95% CI)</b>                           | <b>P</b> | <b>OR (95% CI)</b>                                  | <b>P</b> | <b>OR (95% CI)</b>                          | <b>P</b> |
| <b>Diabetes respondents</b>         |                               |          |                                              |          |                                                     |          |                                             |          |
| 75-85 years relative to 57-64 years | 0.41 (0.22-0.77)              |          | 0.86 (0.52-1.44)                             |          | 0.27 (0.12-0.59)                                    |          | 0.73 (0.39-1.39)                            |          |
| 65-74 years relative to 57-64 years | 0.54 (0.34-0.88)              |          | 0.68 (0.40-1.16)                             |          | 0.31 (0.16-0.59)                                    |          | 0.72 (0.37-1.38)                            |          |
| 57-64 years                         | 1 (ref)                       |          | 1 (ref)                                      |          | 1 (ref)                                             |          | 1 (ref)                                     |          |
| <b>Respondents without diabetes</b> |                               |          |                                              |          |                                                     |          |                                             |          |
| 75-85 years relative to 57-64 years | 1.51 (1.19-1.91)              |          | 1.73 (1.31-2.29)                             |          | 0.60 (0.36-0.98)                                    |          | 1.20 (0.82-1.74)                            |          |
| 65-74 years relative to 57-64 years | 0.97 (0.75-1.24)              |          | 0.94 (0.68-1.32)                             |          | 0.55 (0.36-0.84)                                    |          | 0.89 (0.61-1.30)                            |          |
| 57-64 year, referent                | 1 (ref)                       |          | 1 (ref)                                      |          | 1 (ref)                                             |          | 1 (ref)                                     |          |
| <b>Age-diabetes interaction</b>     |                               | 0.007    |                                              | 0.03     |                                                     | 0.2      |                                             | 0.2      |

1. Models are adjusted for gender, ethnic group, and educational attainment. 2. Depression is defined as CES-D score greater than or equal to 9 on 11-item CES-D scale.
